# Supplementary material for: Side-Arm Assisted Anilido-Imine Based Rare-Earth Metal Complexes for Isoprene Stereoselective Polymerization
Source: MDPI journal article supplement (doi:10.3390/molecules26144154), 2021-07-08
Supplement: s1 [file s1]

# Synthesis of Rare-Earth Metal Complexes with Chelating Anilido-Imine Ligands and Catalysis for Isoprene Polymerization

*Yi Wu*<sup>1,2</sup>, *Xinli Liu*<sup>1,2,\*</sup> and *Dongmei Cui*<sup>1,2,\*</sup>

<sup>1</sup>State Key Laboratory of Polymer Physics and Chemistry, Changchun Institute of Applied Chemistry, Chinese Academy of Sciences, Changchun 130022, China.

<sup>2</sup>Department of Polymer Science and Engineering, University of Science and Technology of China. Hefei 230026, China.

## Contents

**Figure S1.** <sup>1</sup>H NMR spectrum (500 MHz, CDCl<sub>3</sub>, 25 °C) of ligand HL<sub>1</sub>.

**Figure S2.** <sup>1</sup>H NMR spectrum (500 MHz, CDCl<sub>3</sub>, 25 °C) of ligand HL<sub>2</sub>.

**Figure S3.** <sup>1</sup>H NMR spectrum (500 MHz, C<sub>6</sub>D<sub>6</sub>, 25 °C) of complex **1a**.

**Figure S4.** <sup>13</sup>C NMR spectrum (125 MHz, C<sub>6</sub>D<sub>6</sub>, 25 °C) of complex **1a**.

**Figure S5.** <sup>1</sup>H NMR spectrum (500 MHz, C<sub>6</sub>D<sub>6</sub>, 25 °C) of complex **1b**.

**Figure S6.** <sup>13</sup>C NMR spectrum (125 MHz, C<sub>6</sub>D<sub>6</sub>, 25 °C) of complex **1b**.

**Figure S7.** <sup>1</sup>H NMR spectrum (500 MHz, C<sub>6</sub>D<sub>6</sub>, 25 °C) of complex **1c**.

**Figure S8.** <sup>13</sup>C NMR spectrum (125 MHz, C<sub>6</sub>D<sub>6</sub>, 25 °C) of complex **1c**.

**Figure S9.** <sup>1</sup>H NMR spectrum (500 MHz, C<sub>6</sub>D<sub>6</sub>, 25 °C) of complex **2a**.

**Figure S10.** <sup>13</sup>C NMR spectrum (125 MHz, C<sub>6</sub>D<sub>6</sub>, 25 °C) of complex **2a**.

**Figure S11.**  $^1\text{H}$  NMR spectrum (500 MHz,  $\text{C}_6\text{D}_6$ , 25  $^\circ\text{C}$ ) of complex **2b**.

**Figure S12.**  $^{13}\text{C}$  NMR spectrum (125 MHz,  $\text{C}_6\text{D}_6$ , 25  $^\circ\text{C}$ ) of complex **2b**.

**Figure S13.**  $^1\text{H}$  NMR spectrum (500 MHz,  $\text{C}_6\text{D}_6$ , 25  $^\circ\text{C}$ ) of complex **2c**.

**Figure S14.**  $^{13}\text{C}$  NMR spectrum (125 MHz,  $\text{C}_6\text{D}_6$ , 25  $^\circ\text{C}$ ) of complex **2c**.

**Figure S15.**  $^1\text{H}$  NMR spectrum (500 MHz,  $\text{CDCl}_3$ , 25  $^\circ\text{C}$ ) of *cis*-1,4 PIP (Table 1, entry 3).

**Figure S16.**  $^{13}\text{C}$  NMR spectrum (125 MHz,  $\text{CDCl}_3$ , 25  $^\circ\text{C}$ ) of *cis*-1,4 PIP (Table 1, entry 3).

**Figure S17.**  $^1\text{H}$  NMR spectrum (500 MHz,  $\text{CDCl}_3$ , 25  $^\circ\text{C}$ ) of *trans*-1,4 PIP (Table 1, entry 4).

**Figure S18.**  $^{13}\text{C}$  NMR spectrum (125 MHz,  $\text{CDCl}_3$ , 25  $^\circ\text{C}$ ) of *trans*-1,4 PIP (Table 1, entry 4).

**Table S1.** Crystal data and structure refinement for complexes **1a**, **1c**, **2a**, **2c**.

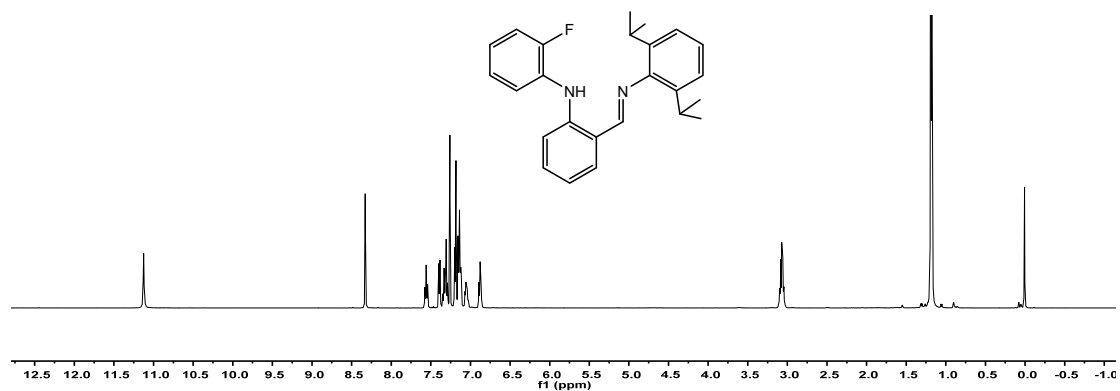

**Figure S1.**  $^1\text{H}$  NMR spectrum (500 MHz,  $\text{CDCl}_3$ , 25  $^\circ\text{C}$ ) of ligand  $\text{HL}_1$ .

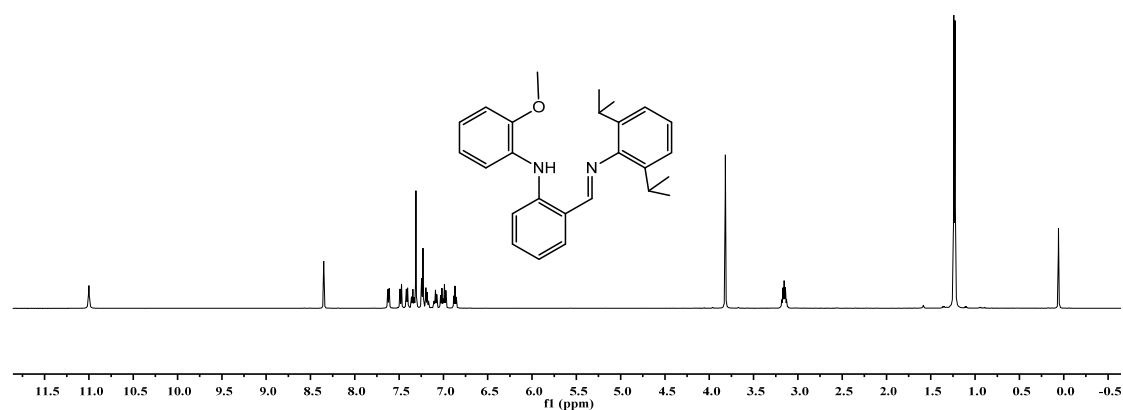

**Figure S2.**  $^1\text{H}$  NMR spectrum (500 MHz,  $\text{CDCl}_3$ , 25  $^\circ\text{C}$ ) of ligand  $\text{HL}_2$ .

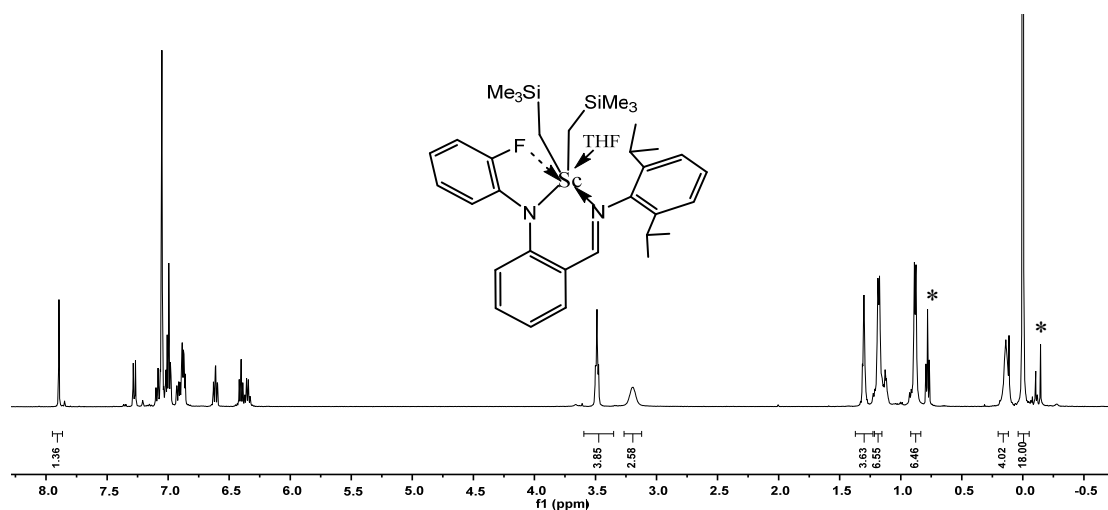

**Figure S3.**  $^1\text{H}$  NMR spectrum (500 MHz,  $\text{C}_6\text{D}_6$ , 25  $^\circ\text{C}$ , \*: impurity) of complex **1a**.

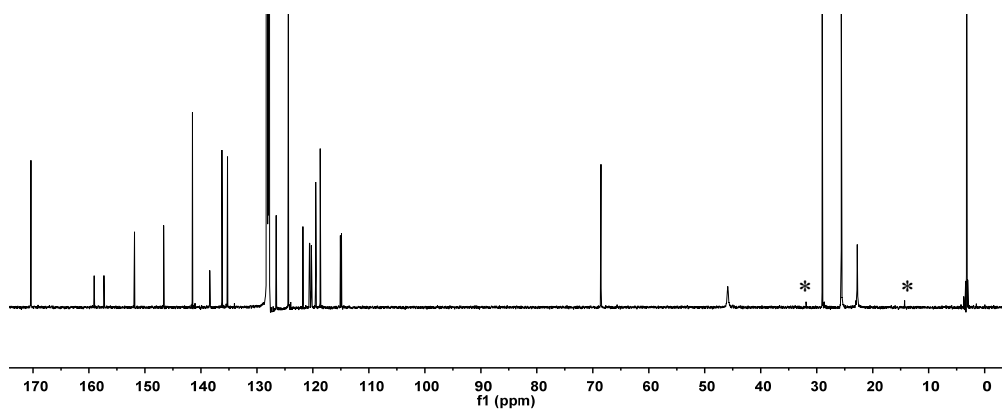

**Figure S4.**  $^{13}\text{C}$  NMR spectrum (125 MHz,  $\text{C}_6\text{D}_6$ , 25  $^\circ\text{C}$ , \*: impurity) of complex **1a**.

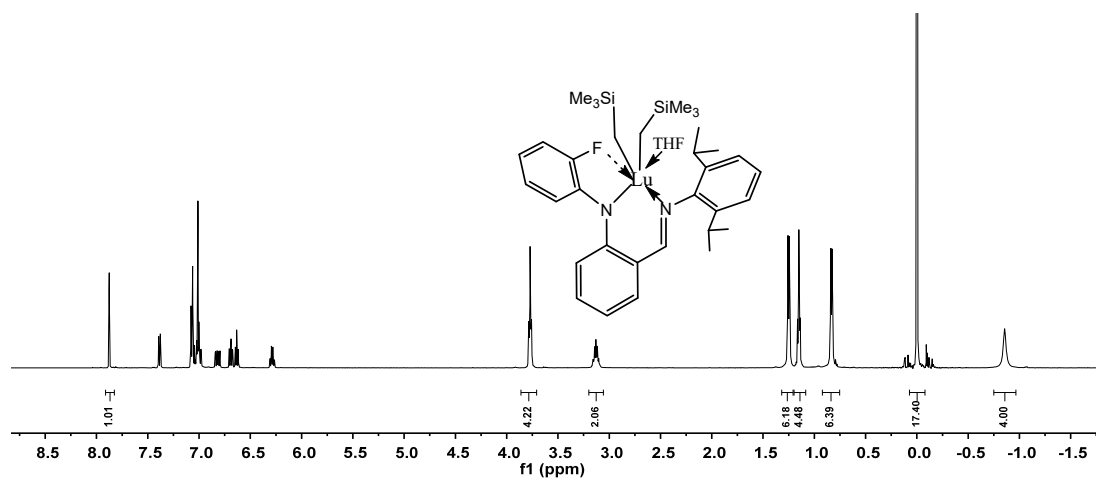

**Figure S5.**  $^1\text{H}$  NMR spectrum (500 MHz,  $\text{C}_6\text{D}_6$ , 25  $^\circ\text{C}$ ) of complex **1b**.

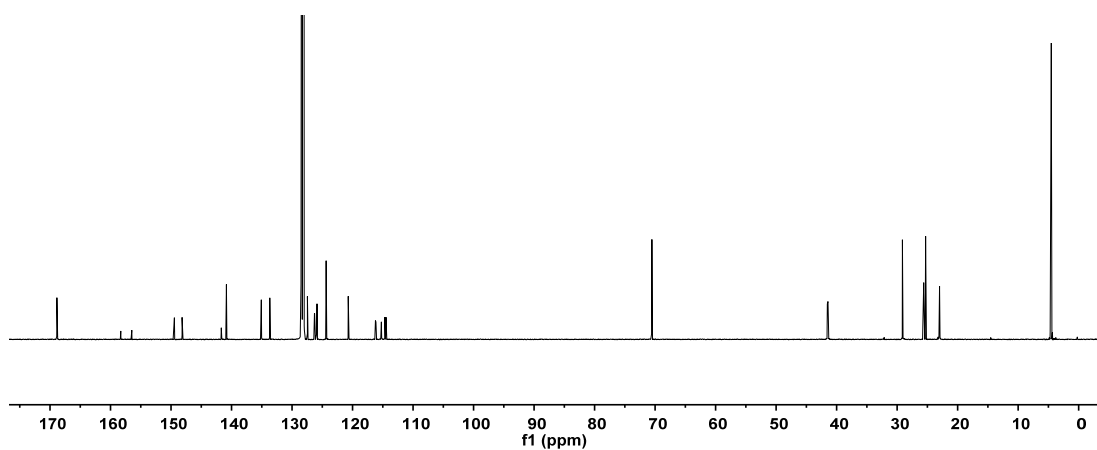

**Figure S6.**  $^{13}\text{C}$  NMR spectrum (125 MHz,  $\text{C}_6\text{D}_6$ , 25  $^\circ\text{C}$ ) of complex **1b**.

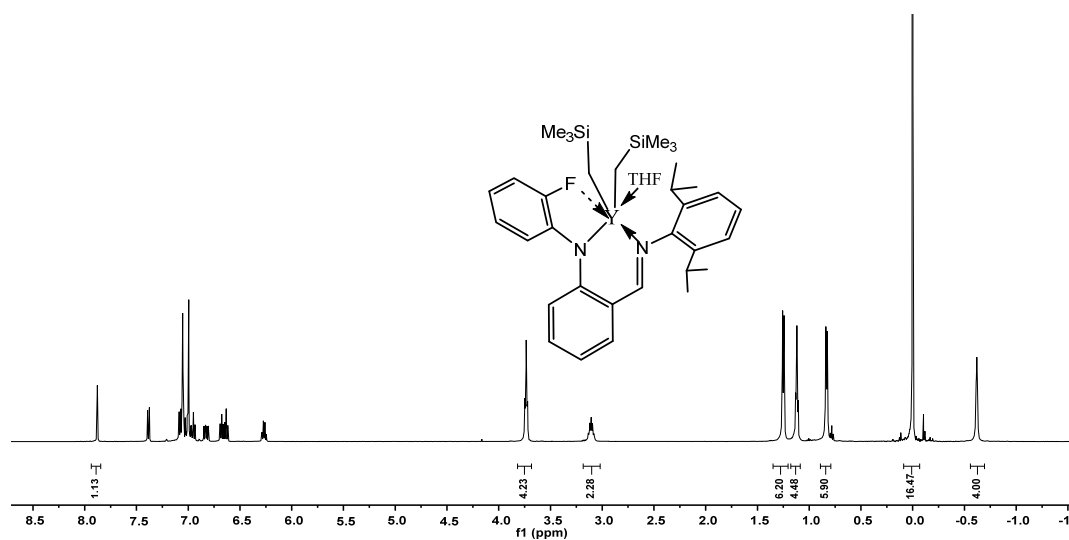

**Figure S7.**  $^1\text{H}$  NMR spectrum (500 MHz,  $\text{C}_6\text{D}_6$ , 25  $^\circ\text{C}$ ) of complex **1c**.

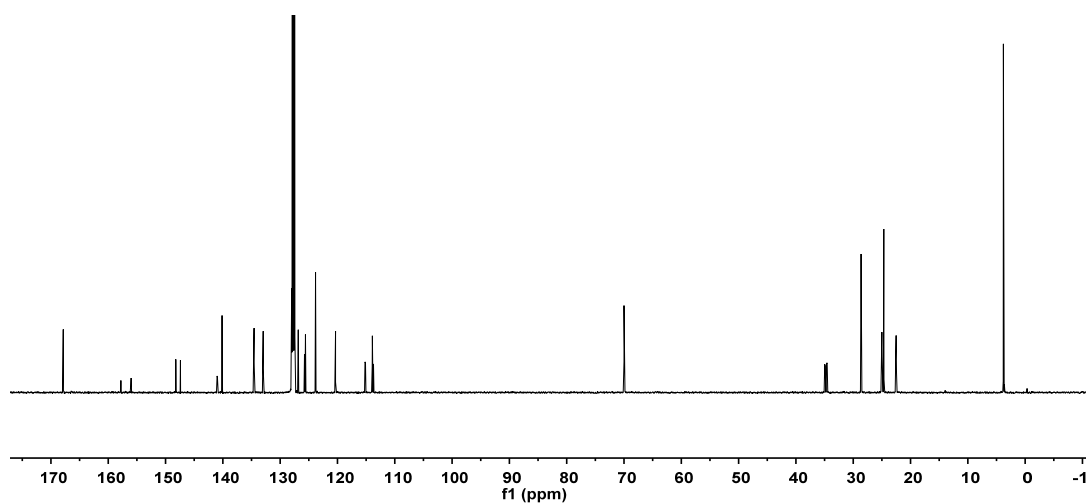

**Figure S8.**  $^{13}\text{C}$  NMR spectrum (125 MHz,  $\text{C}_6\text{D}_6$ , 25  $^\circ\text{C}$ ) of complex **1c**.

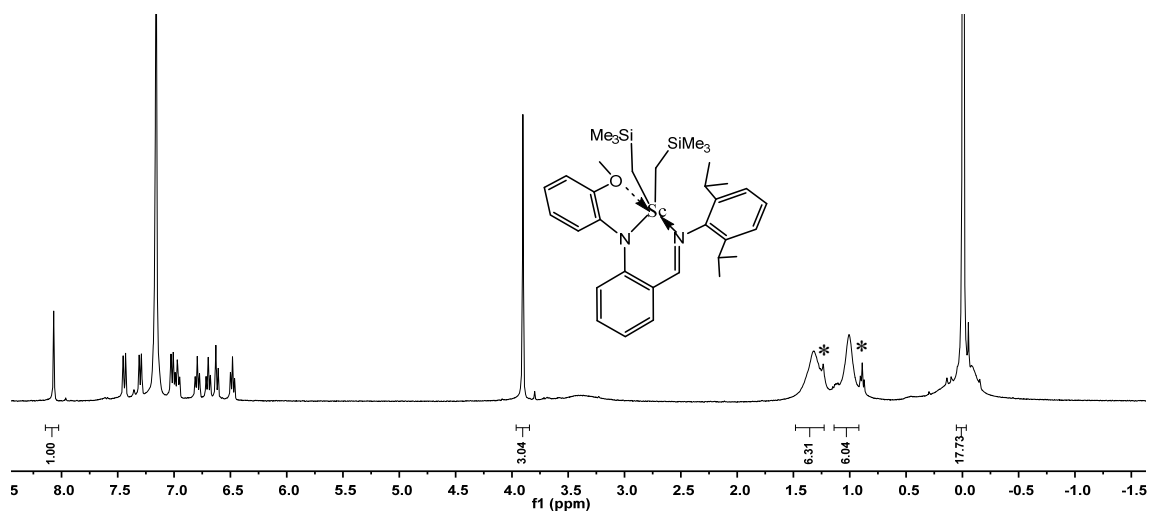

**Figure S9.**  $^1\text{H}$  NMR spectrum (500 MHz,  $\text{C}_6\text{D}_6$ , 25  $^\circ\text{C}$ , \*: n-hexane) of complex **2a**.

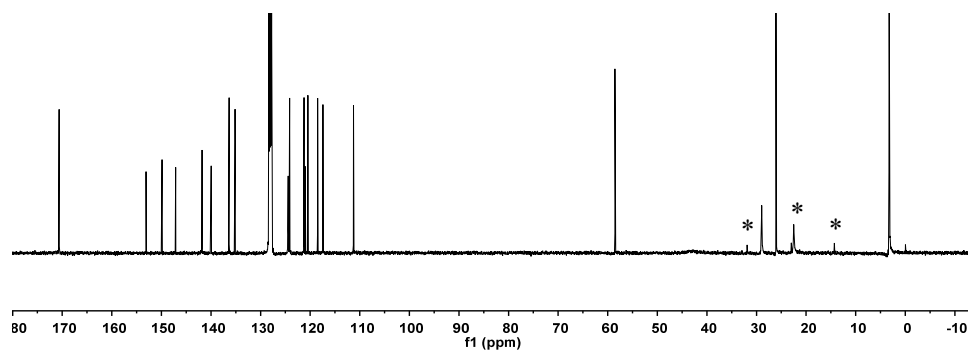

**Figure S10.**  $^{13}\text{C}$  NMR spectrum (125 MHz,  $\text{C}_6\text{D}_6$ , 25  $^\circ\text{C}$ , \*: n-hexane) of complex **2a**.

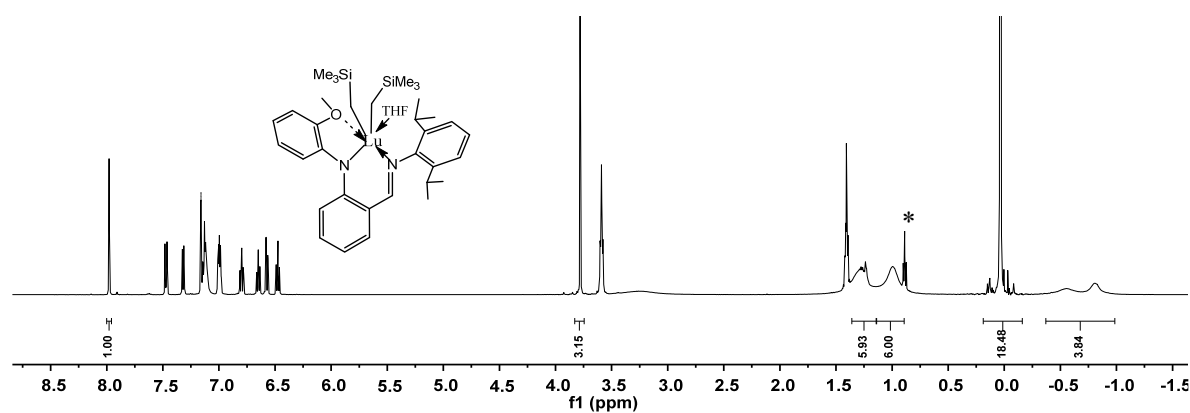

**Figure S11.**  $^1\text{H}$  NMR spectrum (500 MHz,  $\text{C}_6\text{D}_6$ , 25  $^\circ\text{C}$ , \*: n-hexane) of complex **2b**.

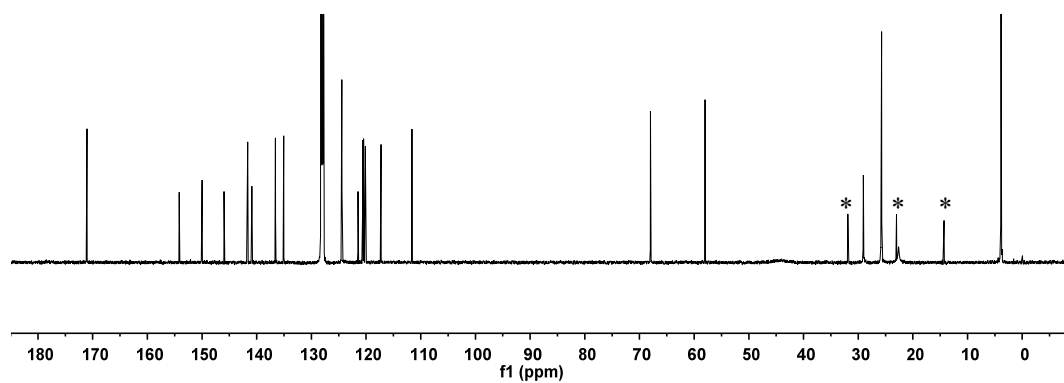

**Figure S12.**  $^{13}\text{C}$  NMR spectrum (125 MHz,  $\text{C}_6\text{D}_6$ , 25  $^\circ\text{C}$ , \*: n-hexane) of complex **2b**.

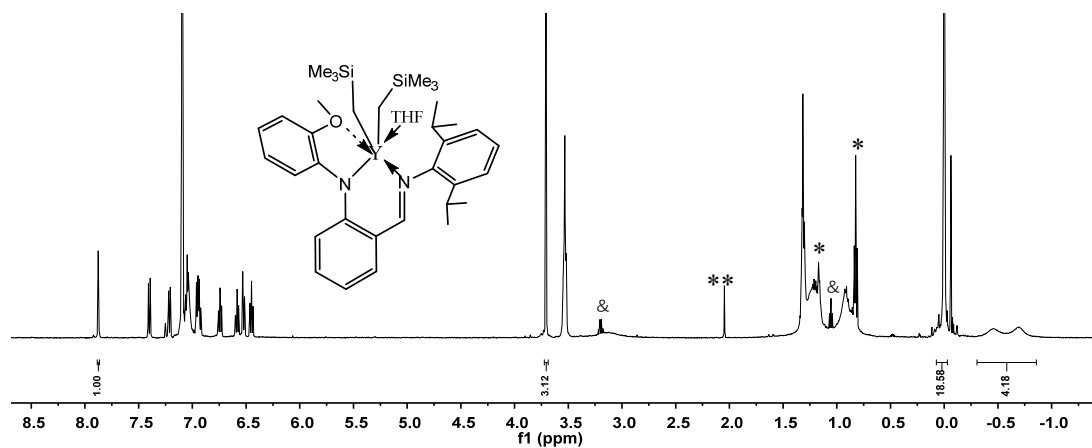

**Figure S13.**  $^1\text{H}$  NMR spectrum (500 MHz,  $\text{C}_6\text{D}_6$ , 25  $^\circ\text{C}$ , \*: n-hexane, \*\*: toluene, &: impurity) of complex **2c**.

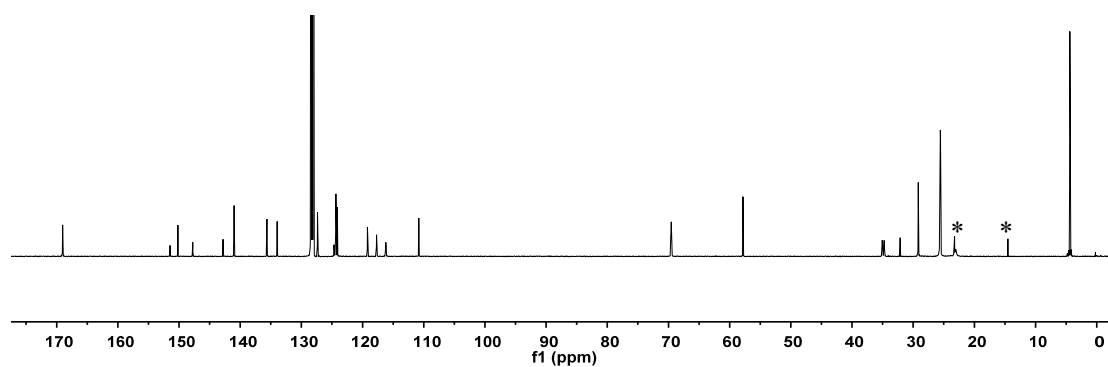

**Figure S14.**  $^{13}\text{C}$  NMR spectrum (125 MHz,  $\text{C}_6\text{D}_6$ , 25  $^\circ\text{C}$ , \*: n-hexane) of complex **2c**.

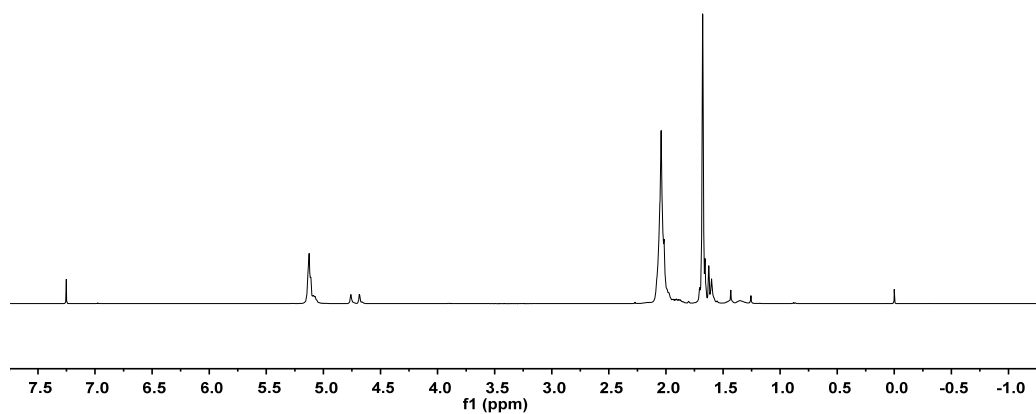

**Figure S15.**  $^1\text{H}$  NMR spectrum (500 MHz,  $\text{CDCl}_3$ , 25  $^\circ\text{C}$ ) of *cis*-1,4 PIP (Table 1, entry 3).

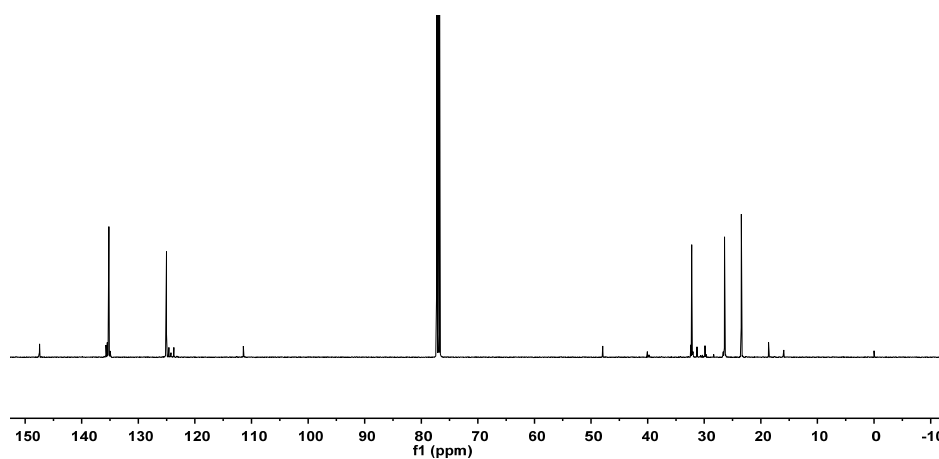

**Figure S16.**  $^{13}\text{C}$  NMR spectrum (125 MHz,  $\text{CDCl}_3$ , 25  $^\circ\text{C}$ ) of *cis*-1,4 PIP (Table 1, entry 3).

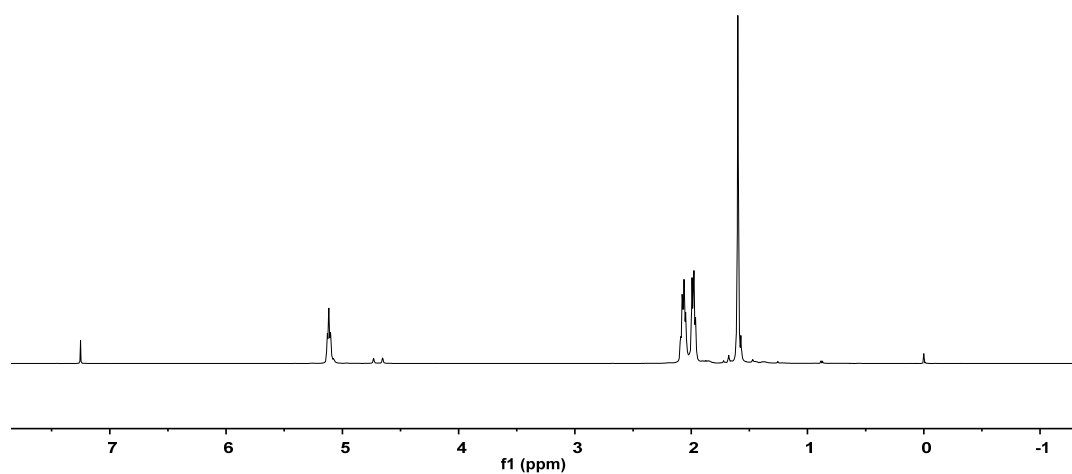

**Figure S17.**  $^1\text{H}$  NMR spectrum (500 MHz,  $\text{CDCl}_3$ , 25  $^\circ\text{C}$ ) of *trans*-1,4 PIP (Table 1, entry 4).

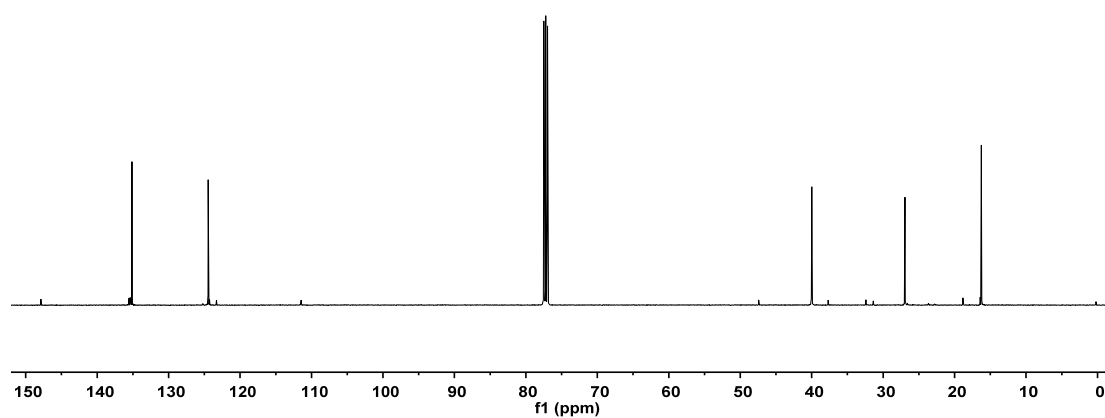

**Figure S18.**  $^{13}\text{C}$  NMR spectrum (125 MHz,  $\text{CDCl}_3$ , 25  $^\circ\text{C}$ ) of *trans*-1,4 PIP (Table 1, entry 4).



**Table S1.** Crystal data and structure refinement for complexes **1a**, **1c**, **2a**, **2c**.

| Identification code                                              | <b>1a</b>                                                           | <b>1c</b>                                                          | <b>2a</b>                                                         | <b>2c</b>                                                                       |
|------------------------------------------------------------------|---------------------------------------------------------------------|--------------------------------------------------------------------|-------------------------------------------------------------------|---------------------------------------------------------------------------------|
| Formula                                                          | C <sub>37</sub> H <sub>55</sub> FN <sub>2</sub> OSi <sub>2</sub> Sc | C <sub>37</sub> H <sub>56</sub> FN <sub>2</sub> OSi <sub>2</sub> Y | C <sub>34</sub> H <sub>51</sub> N <sub>2</sub> OScSi <sub>2</sub> | C <sub>38</sub> H <sub>59</sub> N <sub>2</sub> O <sub>2</sub> Si <sub>2</sub> Y |
| Formula weight                                                   | 664.47                                                              | 708.92                                                             | 604.93                                                            | 716.93                                                                          |
| Crystal dimensions (mm <sup>3</sup> )                            | 0.2×0.18×0.15                                                       | 0.3×0.2×0.1                                                        | 0.3×0.1×0.1                                                       | 0.3×0.1×0.1                                                                     |
| Crystal system                                                   | monoclinic                                                          | orthorhombic                                                       | triclinic                                                         | monoclinic                                                                      |
| Space group                                                      | P 1 21/c 1                                                          | P 21 21 21                                                         | P -1                                                              | P 1 21/n 1                                                                      |
| a(Å)                                                             | 10.5934(13)                                                         | 12.4186(7)                                                         | 10.1127(3)                                                        | 11.3439(4)                                                                      |
| b(Å)                                                             | 38.048(5)                                                           | 13.5705(7)                                                         | 10.5747(4)                                                        | 19.8521(7)                                                                      |
| c(Å)                                                             | 19.364(2)                                                           | 24.0659(13)                                                        | 17.8379(6)                                                        | 18.1172(7)                                                                      |
| $\alpha(^{\circ})$                                               | 90                                                                  | 90                                                                 | 92.8500(10)                                                       | 90                                                                              |
| $\beta(^{\circ})$                                                | 93.539(3)                                                           | 90                                                                 | 91.9980(10)                                                       | 97.7780(10)                                                                     |
| $\mu(^{\circ})$                                                  | 90                                                                  | 90                                                                 | 110.4620(10)                                                      | 90                                                                              |
| Volume (Å <sup>3</sup> )                                         | 7790.0(16)                                                          | 4055.7(4)                                                          | 1782.21(11)                                                       | 4042.5(3)                                                                       |
| <i>Z</i>                                                         | 4                                                                   | 4                                                                  | 1                                                                 | 4                                                                               |
| <i>T</i> (K)                                                     | 273(2)                                                              | 273(2)                                                             | 273(2)                                                            | 273(2)                                                                          |
| <i>D</i> <sub>calcd</sub> (g cm <sup>-3</sup> )                  | 1.133                                                               | 1.161                                                              | 1.1272                                                            | 1.178                                                                           |
| $\mu$ (mm <sup>-1</sup> )                                        | 0.28                                                                | 1.53                                                               | 0.300                                                             | 1.533                                                                           |
| <i>F</i> (000)                                                   | 2860                                                                | 1504                                                               | 653.0590                                                          | 1520                                                                            |
| Rflns.collected                                                  | 45057                                                               | 23187                                                              | 65918                                                             | 71899                                                                           |
| Indep.rflns./ <i>R</i> <sub>int</sub>                            | 15784/0.1413                                                        | 8170/0.0625                                                        | 5593/0.0611                                                       | 11780/0.0722                                                                    |
| Obsd.rflns.[ <i>I</i> <sub>0</sub> >2σ( <i>I</i> <sub>0</sub> )] | 6770                                                                | 5615                                                               | 4836                                                              | 7764                                                                            |

|                                                     |               |               |                |               |
|-----------------------------------------------------|---------------|---------------|----------------|---------------|
| Data/restraints/parameters                          | 15784/0/813   | 8170/6/395    | 5593/0/372     | 11780/0/418   |
| $R_1 / wR_2 [I_0 > 2\sigma(I_0)]$                   | 0.0777/0.1335 | 0.0549/0.1245 | 0.0336/0.0772  | 0.0519/0.1135 |
| $R_1 / wR_2$ (all data)                             | 0.1981/0.1776 | 0.0894/0.1394 | 0.0425/0.0850  | 0.0954/0.1298 |
| GOF (on $F^2$ )                                     | 0.952         | 0.969         | 1.0888         | 1.026         |
| dihedral angel                                      | 49.625        | 53.3          | 44.392         | 50.21         |
| Largest diff. peak and hole<br>(e Å <sup>-3</sup> ) | 0.369/-0.308  | 0.870/-0.578  | 0.2358/-0.3123 | 1.060/-0.567  |
